# Supplementary material
Source: publisher figshare collection journal article supplement (https://rs.figshare.com/ndownloader/files/12866270)
Supplement: Supplementary file 1 [file 12866270]

## Sheet: Sheet1
		Target			Viruses
Name	Description	Pathway	Reaction	Reaction Abbreviation	Species	Genera	Family	Type	References
cyclopentylcytosine			CTP synthetase	CTPS1 / CTPS2	Sindbis, Semliki	Alphavirus	Togaviridae	(+) RNA	Leyssen, P., De Clercq, E., & Neyts, J. (2008). Molecular strategies to inhibit the replication of RNA viruses. Antiviral Research, 78(1), 9–25. http://doi.org/10.1016/j.antiviral.2008.01.005
cyclopentenylcytosine			CTP synthetase	CTPS1 / CTPS2	Sindbis, Semliki	Alphavirus	Togaviridae	(+) RNA	Leyssen, P., De Clercq, E., & Neyts, J. (2008). Molecular strategies to inhibit the replication of RNA viruses. Antiviral Research, 78(1), 9–25. http://doi.org/10.1016/j.antiviral.2008.01.006
			CTP synthetase	CTPS1 / CTPS2		Flavivirus	Flaviviridae	(+) RNA	Marquez, V.E., Lim, M.I., Treanor, S.P., Plowman, J., Priest, M.A., Markovac, A., Khan, M.S., Kaskar, B., Driscoll, J.S., 1988. Cyclopentenylcytosine. A carbocyclic nucleoside with antitumor and antiviral properties. J. Med. Chem. 31, 1687–1694.
DD264	3-(3-Chlorophenyl)-6,7-dihydro-5H-benzofuran-4-one	de novo pyrimidine biosynthesis	Dihydroorotate Dehydrogenase	DHORD9	Chikungunya Virus	Alphavirus	Togaviridae	(+) RNA	Lucas-Hourani, M., Dauzonne, D., Jorda, P., Cousin, G., Lupan, A., Helynck, O., et al. (2013). Inhibition of Pyrimidine Biosynthesis Pathway Suppresses Viral Growth through Innate Immunity. PLoS Pathog, 9(10), e1003678. http://doi.org/10.1371/journal.ppat.1003678
DD264	3-(3-Chlorophenyl)-6,7-dihydro-5H-benzofuran-4-one	de novo pyrimidine biosynthesis	Dihydroorotate Dehydrogenase	DHORD9	West Nile Virus	Flavivirus	Flaviviridae	(+) RNA	Lucas-Hourani, M., Dauzonne, D., Jorda, P., Cousin, G., Lupan, A., Helynck, O., et al. (2013). Inhibition of Pyrimidine Biosynthesis Pathway Suppresses Viral Growth through Innate Immunity. PLoS Pathog, 9(10), e1003678. http://doi.org/10.1371/journal.ppat.1003678
NITD-982		de novo pyrimidine biosynthesis	Dihydroorotate Dehydrogenase	DHORD9	Dengue Virus	Flavivirus	Flaviviridae	(+) RNA	Wang, Q.-Y., Bushell, S., Qing, M., Xu, H. Y., Bonavia, A., Nunes, S., et al. (2011). Inhibition of dengue virus through suppression of host pyrimidine biosynthesis. Journal of Virology, 85(13), 6548–6556. http://doi.org/10.1128/JVI.02510-10
A3		de novo pyrimidine biosynthesis	Dihydroorotate Dehydrogenase	DHORD9	Sindbis Virus	Alphavirus	Togaviridae	(+) RNA	Hoffmann, H.-H., Kunz, A., Simon, V. A., Palese, P., & Shaw, M. L. (2011). Broad-spectrum antiviral that interferes with de novo pyrimidine biosynthesis. Proceedings of the National Academy of Sciences of the United States of America, 108(14), 5777–5782. http://doi.org/10.1073/pnas.1101143108
		de novo pyrimidine biosynthesis	Dihydroorotate Dehydrogenase	DHORD9	Dengue Virus	Flavivirus	Flaviviridae	(+) RNA	Hoffmann, H.-H., Kunz, A., Simon, V. A., Palese, P., & Shaw, M. L. (2011). Broad-spectrum antiviral that interferes with de novo pyrimidine biosynthesis. Proceedings of the National Academy of Sciences of the United States of America, 108(14), 5777–5782. http://doi.org/10.1073/pnas.1101143108
Ribavirin	(1-ß-D-ribofuranosyl-1,2,4-triazole-3-carboxamide)	de novoGMP synthesis	Inosine 5'-monophosphate dehydrogenase	IMPD		Flavivirus	Flaviviridae	(+) RNA	Neyts, J., Meerbach, A., McKenna, P., De Clercq, E., 1996. Use of the yellow fever virus vaccine strain 17D for the study of strategies for the treatment of yellow fever virus infections. Antivir. Res. 30 (2–3), 125–132.
Ribavirin	(1-ß-D-ribofuranosyl-1,2,4-triazole-3-carboxamide)	de novoGMP synthesis	Inosine 5'-monophosphate dehydrogenase	IMPD	Chikungunya Virus	Alphavirus	Togaviridae	(+) RNA	Leyssen, P., De Clercq, E., & Neyts, J. (2008). Molecular strategies to inhibit the replication of RNA viruses. Antiviral Research, 78(1), 9–25. http://doi.org/10.1016/j.antiviral.2008.01.004
VX-497		de novoGMP synthesis	Inosine 5'-monophosphate dehydrogenase	IMPD					Jain, J., Almquist, S. J., Shlyakhter, D., & Harding, M. W. (2001). VX-497: a novel, selective IMPDH inhibitor and immunosuppressive agent. Journal of Pharmaceutical Sciences, 90(5), 625–637.
pyrazofurin			OMP decarboxylase	OMPDC			Togaviridae	(+) RNA	Leyssen, P., De Clercq, E., & Neyts, J. (2008). Molecular strategies to inhibit the replication of RNA viruses. Antiviral Research, 78(1), 9–25. http://doi.org/10.1016/j.antiviral.2008.01.004
6-azauridine			OMP decarboxylase	OMPDC				(+) RNA	Leyssen, P., De Clercq, E., & Neyts, J. (2008). Molecular strategies to inhibit the replication of RNA viruses. Antiviral Research, 78(1), 9–25. http://doi.org/10.1016/j.antiviral.2008.01.004
C-c3Ado	carbo- cyclic 3-deazaadenosine		S-adenosylhomocysteine hydrolase	AHC				(+) RNA	Leyssen, P., De Clercq, E., & Neyts, J. (2008). Molecular strategies to inhibit the replication of RNA viruses. Antiviral Research, 78(1), 9–25. http://doi.org/10.1016/j.antiviral.2008.01.004
neplanocin A			S-adenosylhomocysteine hydrolase	AHC				(+) RNA	Leyssen, P., De Clercq, E., & Neyts, J. (2008). Molecular strategies to inhibit the replication of RNA viruses. Antiviral Research, 78(1), 9–25. http://doi.org/10.1016/j.antiviral.2008.01.004
3-deazaneplanocin A			S-adenosylhomocysteine hydrolase	AHC				(+) RNA	Leyssen, P., De Clercq, E., & Neyts, J. (2008). Molecular strategies to inhibit the replication of RNA viruses. Antiviral Research, 78(1), 9–25. http://doi.org/10.1016/j.antiviral.2008.01.004
aristeromycin			S-adenosylhomocysteine hydrolase	AHC				(+) RNA	Leyssen, P., De Clercq, E., & Neyts, J. (2008). Molecular strategies to inhibit the replication of RNA viruses. Antiviral Research, 78(1), 9–25. http://doi.org/10.1016/j.antiviral.2008.01.004
